# Supplementary material for: Reconstitution of minimal motility system based on Spiroplasma swimming by expressing two bacterial actins in synthetic minimal bacterium
Source: bioRxiv or medRxiv preprint supplement (doi:10.1101/2021.11.16.468548), 2021-12-16
Supplement: Supplementary file [file media-10.pdf]

# Supplementary Materials for

## **Reconstitution of *Spiroplasma* swimming by expressing two bacterial actins in synthetic minimal bacterium**

Hana Kiyama<sup>1</sup>, Shigeyuki Kakizawa<sup>2</sup>, Yuya Sasajima<sup>1</sup>, Yuhei O Tahara<sup>1,3</sup>,  
Makoto Miyata<sup>1,3\*</sup>

Correspondence to: [miyata@osaka-cu.ac.jp](mailto:miyata@osaka-cu.ac.jp)

### **This PDF file includes:**

Figs. S1 to S5  
Tables S1 to S2  
Captions for Movies S1 to S8  
Captions for Data S1

### **Other Supplementary Materials for this manuscript include the following:**

Movies S1 to S8  
Data S1

<insert page break then Fig. S1 here>

pSeW001 (12.9 kb)

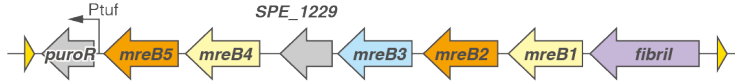

pSeW002 (12.7 kb)

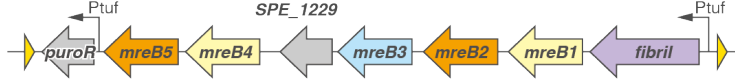

pSeW005 (12.0 kb)

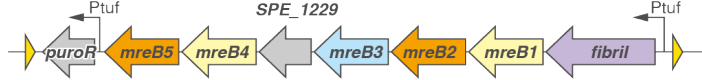

pSeW102 (12.7 kb)

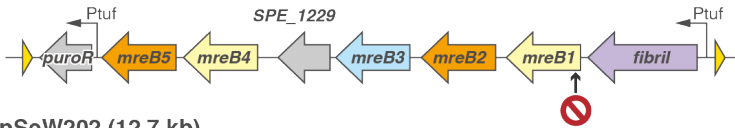

pSeW202 (12.7 kb)

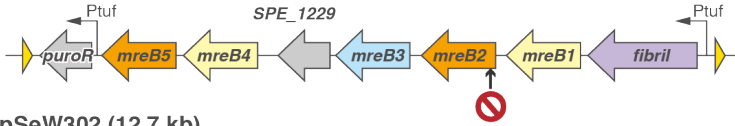

pSeW302 (12.7 kb)

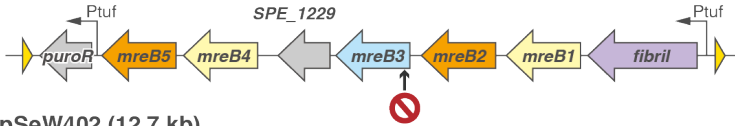

pSeW402 (12.7 kb)

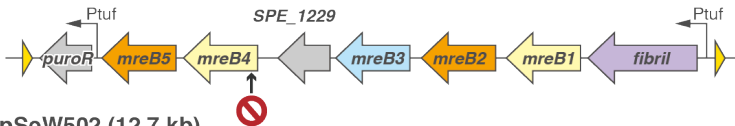

pSeW502 (12.7 kb)

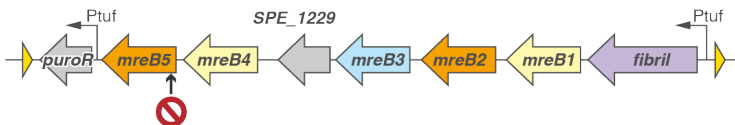

pSeW602 (12.7 kb)

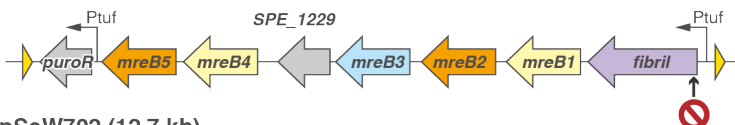

pSeW702 (12.7 kb)

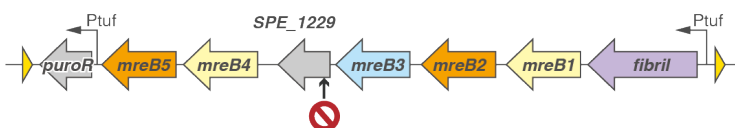

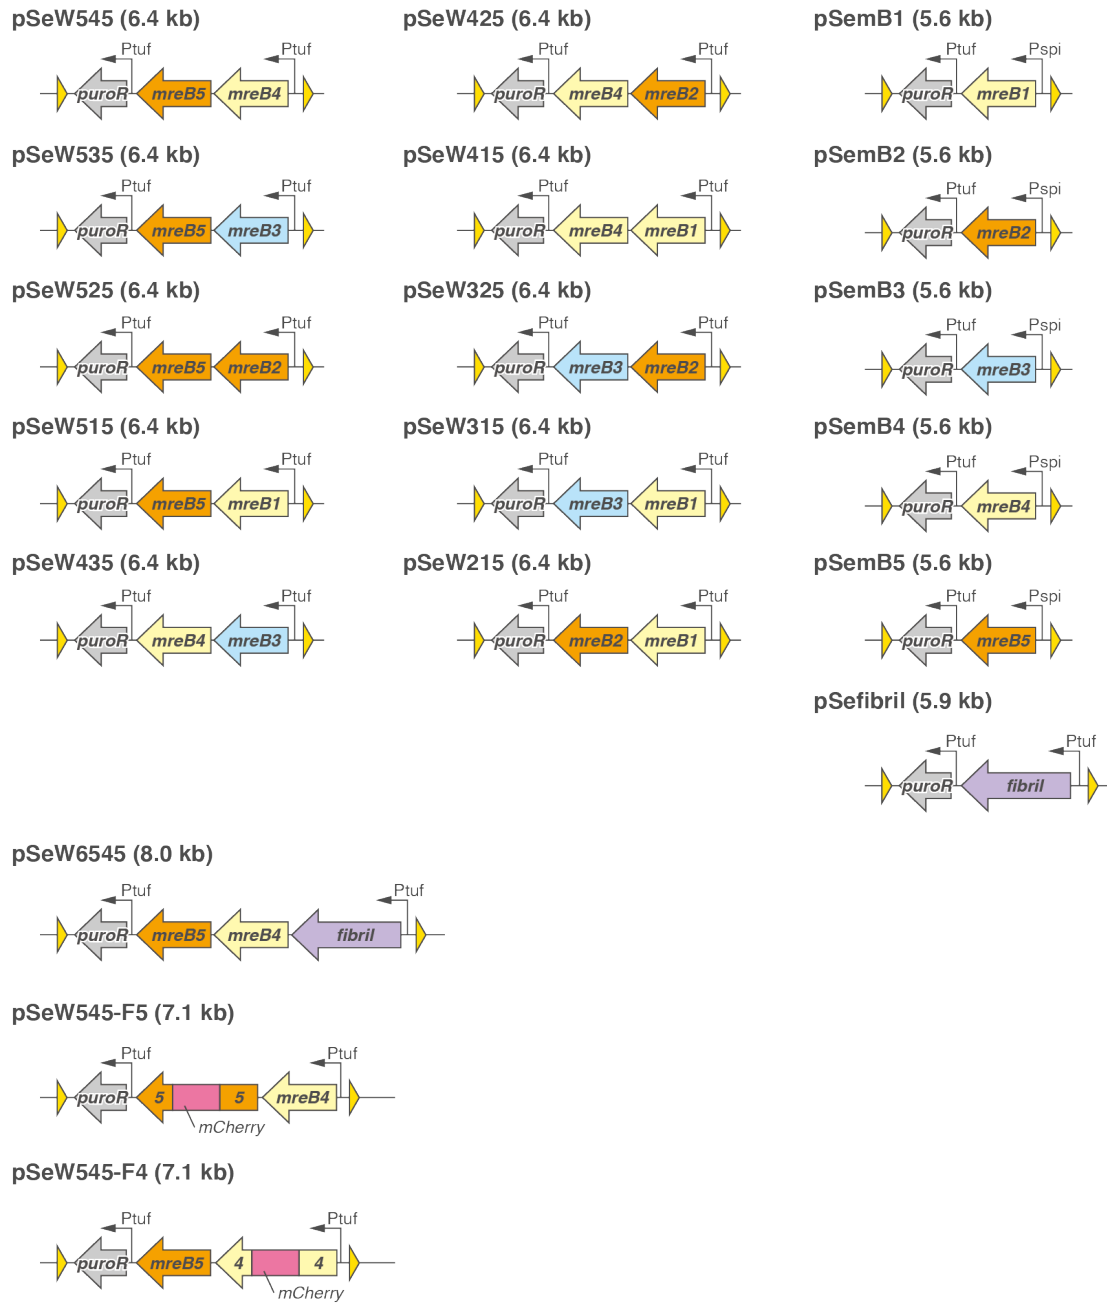

**Fig. S1.**  
Schematic presentation for DNA constructs used in this study.

*S. eriocheiris*

syn3Bsw

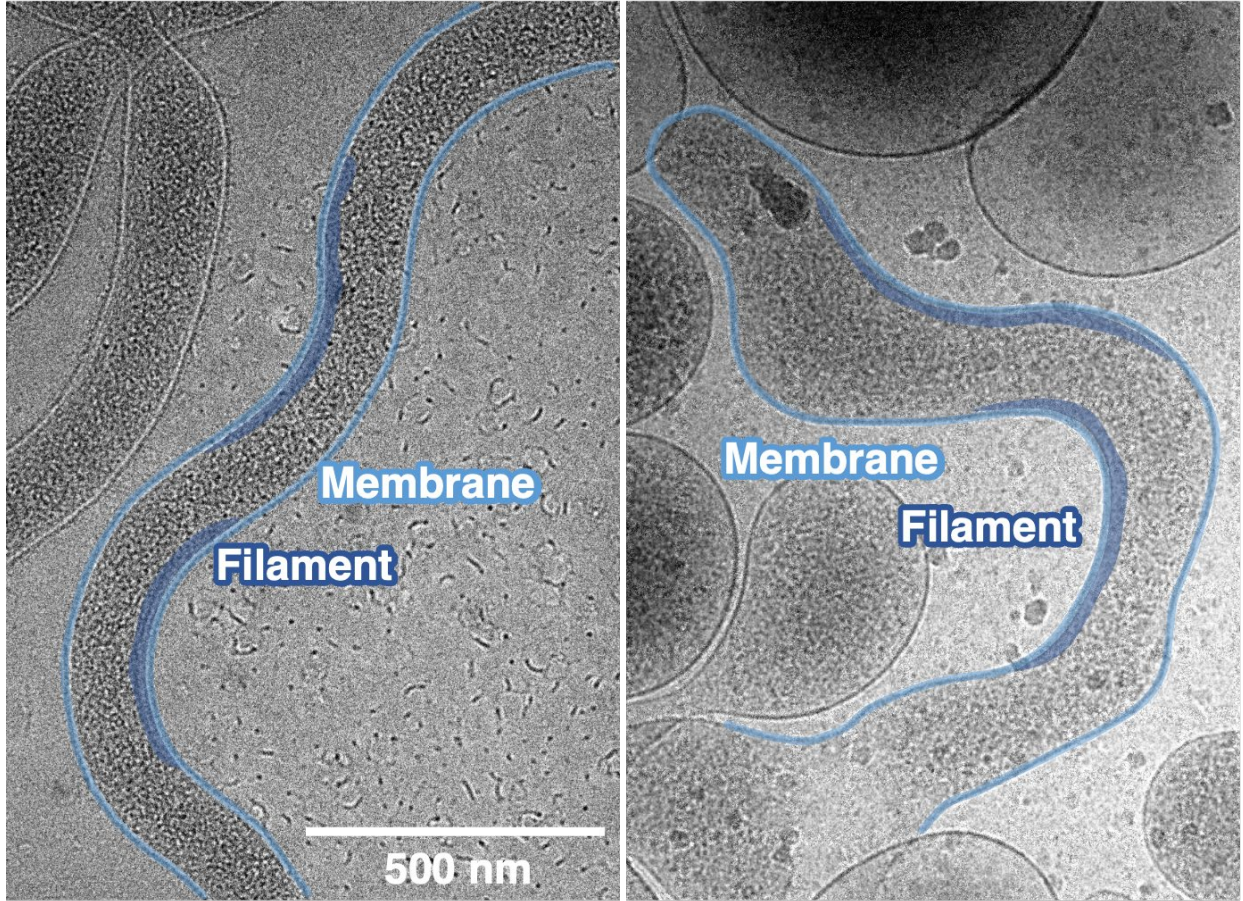

**Fig. S2.**

Cell images under cryo electron microscopy. The cell membrane and filamentous structures are colored light and dark blue, respectively.

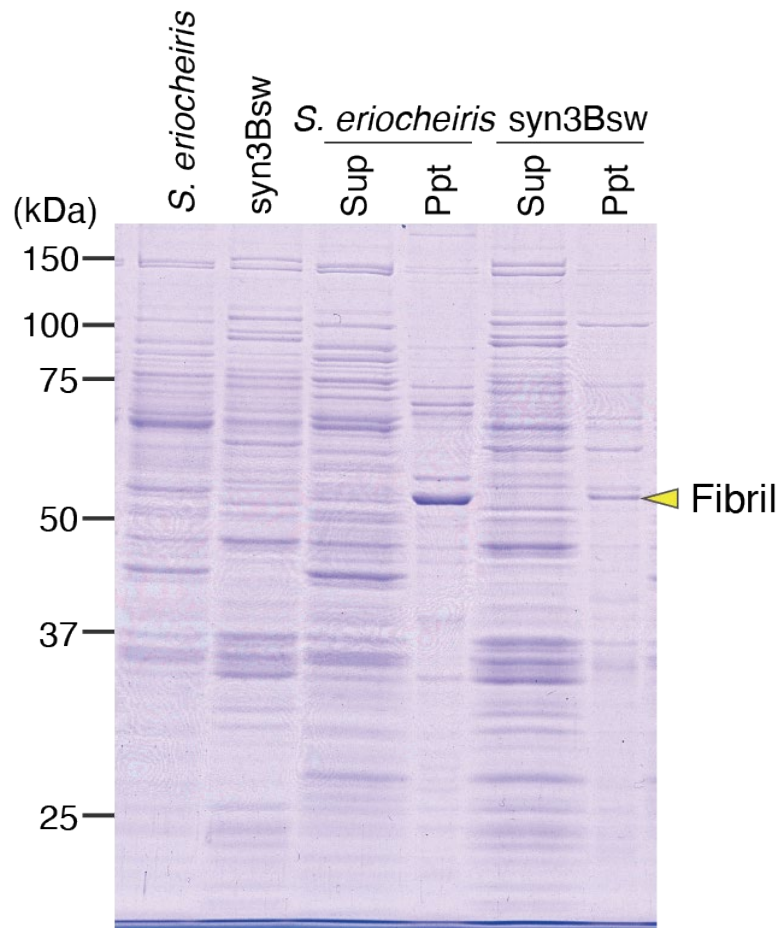

**Fig. S3.**

Identification of fibril protein in *syn3Bsw*. The cultured cells were treated by \*\*\* and fractionated by centrifugation, and analyzed by SDS-10% PAGE. The whole cell lysates are shown in left two lanes. Fibril protein is marked. Protein bands were stained by Coomassie Brilliant Blue.



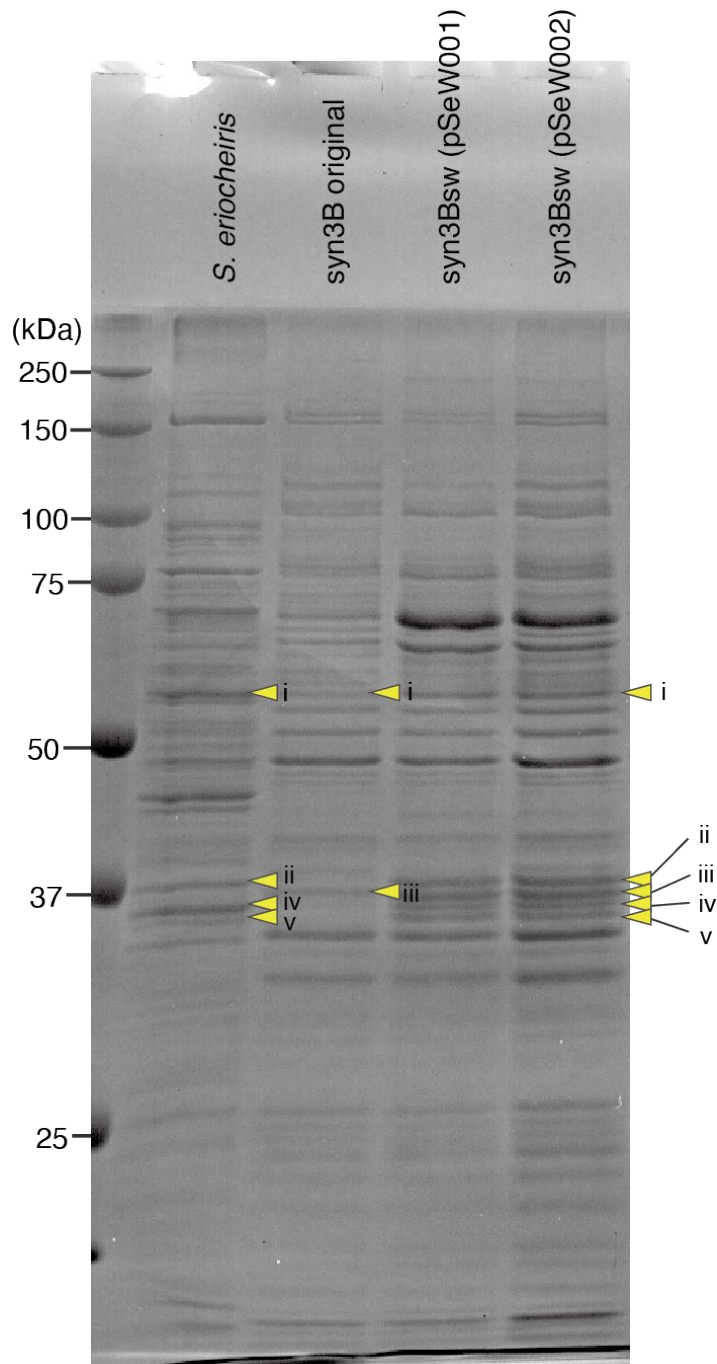

**Figure S4.**

Whole protein profiles of cell lysates visualized by SDS-12.5% PAGE. Constructs are indicated on the top and focused protein bands are marked by a yellow triangle with a number. Protein bands were stained by Coomassie Brilliant Blue.

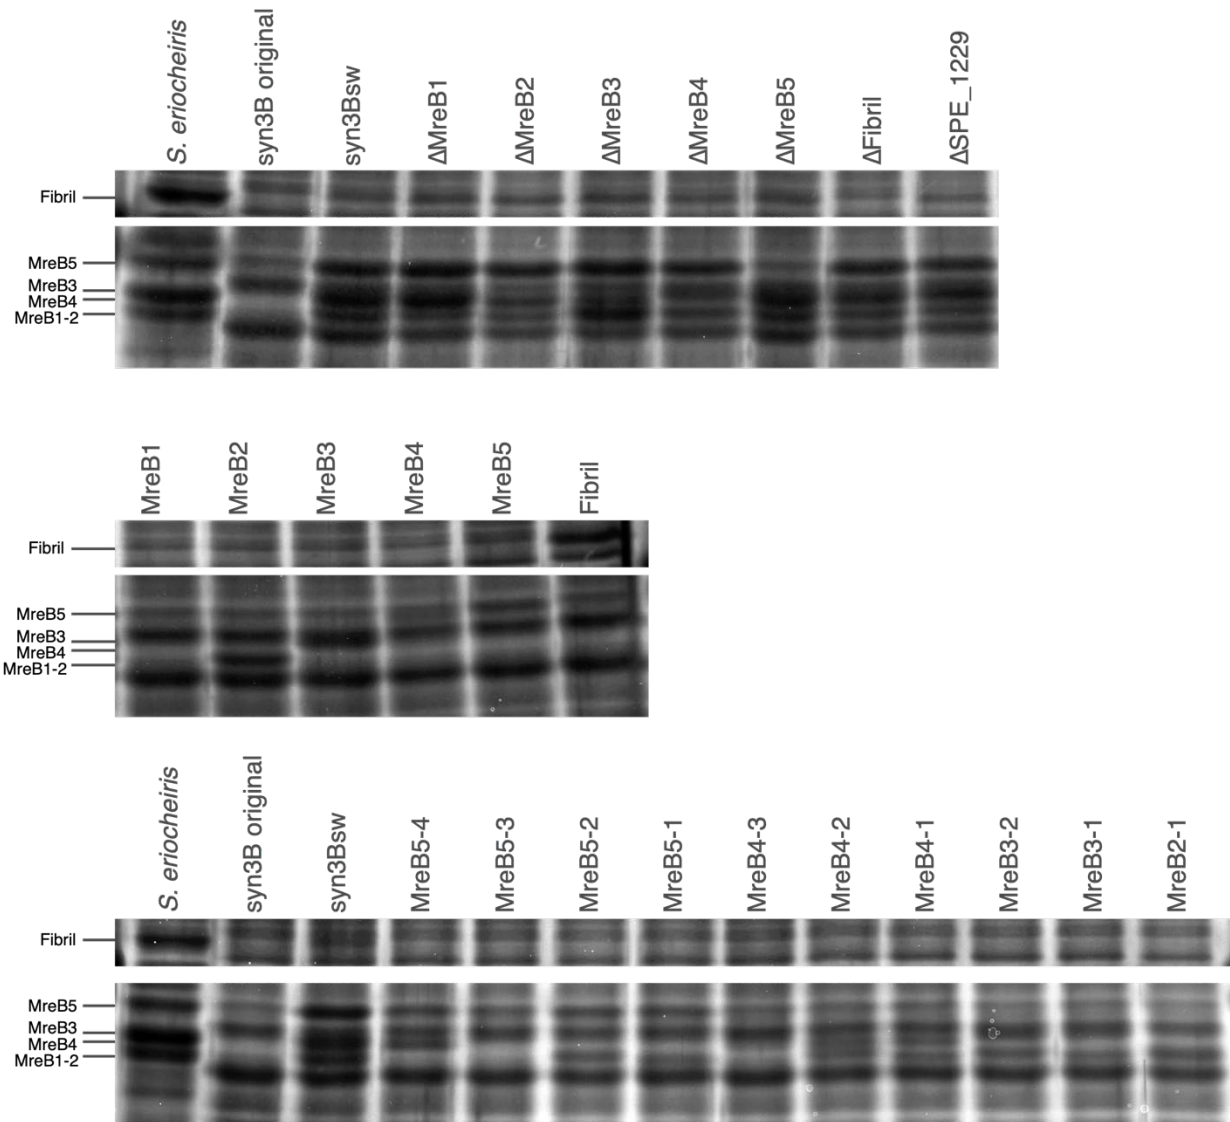

**Figure S5.**

Profiles of focused proteins visualized by SDS-10% PAGE. Constructs are indicated on the top and the protein names are shown on the left. Protein bands were stained by the reverse staining method.

**Table S1.****DNA primers used in this study.**

| Name              | Sequence                                        | Purpose                                                                                                                         |
|-------------------|-------------------------------------------------|---------------------------------------------------------------------------------------------------------------------------------|
| w_mreb3to5_R      | TATAAAATTTAAAAATTACTTGGTATTGATAGTAAG            | pSeW001                                                                                                                         |
| w_mreb2_F         | ACCAAGTAATTTTTAAATTTTATATTCTTTTGCTTC            | pSeW001                                                                                                                         |
| w_mreb2_R         | TTAGATTATTAATTCGCCCTACTAAAAGTAGTTG              | pSeW001                                                                                                                         |
| w_mreb1_F         | GTGAGGGAGAATTTAATAATCTAATTCTTTGTTTT             | pSeW001                                                                                                                         |
| w_mreb1_R         | AAAAGTGAATAATTGCCTGAAGATTTAATAATAATT            | pSeW001                                                                                                                         |
| w_fibril_F        | ATCTTCAGGCAATTATTCACCTTTTAAACGAATAGT            | pSeW001                                                                                                                         |
| w_fibril_R        | TTGACAGCTAGCTCAGTCCTACCTTAAGTTTACTGGATTTTAAAG   | pSeW001                                                                                                                         |
| LP_inverse_R      | GAACTATATAATAACTCGCATATTG                       | pSeW001, pSemB1,<br>pSemB2, pSemB3, pSemB4,<br>pSemB5, pSefibril,<br>pSeW435, pSeW425,<br>pSeW415, pSeW325,<br>pSeW315, pSeW215 |
| LP_inverse_F      | AGGACTGAGCTAGCTGTCAAAGATC                       | pSeW001, pSemB2, pSefibril                                                                                                      |
| w_mreb3to5_F      | GCGAGTTATTTATATAGTTCTTATTTTTCTTCCCAATGCCAGC     | pSeW001, pSemB5                                                                                                                 |
| addFib-to079-F    | GAGTTATTTATATAGTTCTTATTCACCTTTTAAACGAATAGT      | pSeW002, pSefibril                                                                                                              |
| addFib-toPtuf-R   | TTTTAAGGAGAAAAAACATGATTGGAGTTATTTCAACTGCG       | pSeW002, pSefibril                                                                                                              |
| Ptuf-to079-R      | GACAGCTAGCTCAGTCCTTATTTTTGAATTAAGTATTAAAT       | pSeW002, pSefibril                                                                                                              |
| Ptuf-F            | GTTTTTTCTCCTTAAAATTTCTATAAC                     | pSeW002, pSefibril,<br>pSeW545, pSeW535,<br>pSeW525, pSeW515,<br>pSeW435, pSeW425,<br>pSeW415, pSeW325,<br>pSeW315, pSeW215     |
| Stop-mreB1-F      | TACAAAAGTCGGTACTTATTGTTAATC                     | pSeW102                                                                                                                         |
| Stop-mreB1-R      | CAATAAGTAACCGACTTTTGTATCAATT                    | pSeW102                                                                                                                         |
| Stop-mreB2-F      | TACGCGACAGTTTATGCAGTTCCTAA                      | pSeW202                                                                                                                         |
| Stop-mreB2-R      | GAAGTGCATAAACTGTCGCGTATGTC                      | pSeW202                                                                                                                         |
| Stop-mreB3-F      | ACGAGGTGGTTAAGGAGAAATATTAATG                    | pSeW302                                                                                                                         |
| Stop-mreB3-R      | TTTCTCCTTAACCACCTCGTAAATTTATTG                  | pSeW302                                                                                                                         |
| stop-mreB4-F      | GAAAGTTGGTTATTTACTTTTGCCGCTA                    | pSeW402                                                                                                                         |
| stop-mreB4-R      | AAAGTAAATAACCAACTTTCGTTTCAAT                    | pSeW402                                                                                                                         |
| Stop-mreB5-F2     | CCCTTGACCTTAAACGTAAGCTAACACG                    | pSeW502                                                                                                                         |
| Stop-mreB5-R2     | CTTACGTTTAAGGTCAAGGGATTATCTA                    | pSeW502                                                                                                                         |
| MreB1-F           | GCGAGTTATTTATATAGTTCTTAATAATCTAATTCTTTGTTTT     | pSemB1                                                                                                                          |
| MreB1-Pspi-R      | GAGAAAGGAAATATAAGATCATGGCATTGATTAACAATAAGAAA    | pSemB1                                                                                                                          |
| Pspi_inverse-F    | GATCTTATATTTCTTTCTCTATT                         | pSemB1, pSemB3, pSemB4,<br>pSemB5                                                                                               |
| MreB2_R           | ATGGCTAATTATAAATTTGGAAAA                        | pSemB2                                                                                                                          |
| MreB2_Pspi_F      | AAATTTATAATTAGCCATGATCTTATATTTCTTTCTCTATTAAGTAG | pSemB2                                                                                                                          |
| LP_insert_Pspi_R  | GACAGCTAGCTCAGTCCTAATTAAGTTAGTGAACAAGAAA        | pSemB2                                                                                                                          |
| LP_insert_MreB2_F | GAGTTATTTATATAGTTCTTAAATTTTATATTCTTTTGCTTC      | pSemB2, pSeW215                                                                                                                 |
| MreB3-Pspi-R      | GAGAAAGGAAATATAAGATCATGACTATAACAGACGTATTAAAA    | pSemB3                                                                                                                          |
| MreB3-F           | GCGAGTTATTTATATAGTTCTTATTTATTTTTTTTATTTTCTTC    | pSemB3, pSeW325,<br>pSeW315                                                                                                     |
| MreB4-Pspi-R      | GAGAAAGGAAATATAAGATCATGTTAGATATTGTTTATGTTTAT    | pSemB4                                                                                                                          |
| MreB4-F           | GCGAGTTATTTATATAGTTCTTAGTAATCTAATTCTTTAGTATG    | pSemB4, pSeW435,<br>pSeW425, pSeW415                                                                                            |
| MreB5-Pspi-R      | GAGAAAGGAAATATAAGATCGTGAACAGAAAGACCATTTATC      | pSemB5                                                                                                                          |
| mreB4-Ptuf-ORF-R  | AATTTTAAGGAGAAAAAACATGGCAGGATTTAATAGCGGCAA      | pSeW545                                                                                                                         |
| SD-mreB5-R        | ATATTAAGGAGGAAATTAACGTGAA                       | pSeW535, pSeW525,<br>pSeW515                                                                                                    |
| mreB3-Ptuf-R      | AATTTTAAGGAGAAAAAACATGACTATAACAGACGTATTAAAA     | pSeW535, pSeW435                                                                                                                |
| mreB3-SD-mreB5-F  | GTTAATTTCTCCTTAATATTTATTTATTTTTTTTATTTTCTTCAATT | pSeW535                                                                                                                         |
| mreB2- Ptuf-R     | AATTTTAAGGAGAAAAAACATGGCTAATTATAAATTTGGAAAA     | pSeW525, pSeW425,<br>pSeW325                                                                                                    |



|                    |                                              |                                       |
|--------------------|----------------------------------------------|---------------------------------------|
| mreB2- SD-mreB5-F  | GTTAATTCCTCCTTAATATTTAAATTTTATATTCTTTTGCTTC  | pSeW525                               |
| mreB1- Ptuf-R      | AATTTTAAGGAGAAAAAACATGGCATTGATTAACAATAAGAAA  | pSeW515, pSeW415,<br>pSeW315, pSeW215 |
| mreB1- SD-mreB5-F  | GTTAATTCCTCCTTAATATTTAATAATCTAATTCTTTGTTTTTG | pSeW515                               |
| mreB3-mreB4-F      | CCTCCCTTTTTTATTTATTTTTTTTATTTTCTTC           | pSeW435                               |
| mreB4-mreB3-R      | AAATAAATAAAAAAGGGAGGAATTTTACAATG             | pSeW435                               |
| mreB2_mreB4_F      | CCTCCCTTTTTTAAATTTTATATTCTTTTGCTTC           | pSeW425                               |
| mreB2_mreB4_R      | TAAAAATTTAAAAAAGGGAGGAATTTTACAAT             | pSeW425                               |
| mreB1-only-F       | TTAATAATCTAATTCTTTGTTTTTGA                   | pSeW415, pSeW315                      |
| mreB4-mreB1-R      | ACAAAGAATTAGATTATTAATAAAGGGAGGAATTTTACAATG   | pSeW415                               |
| mreB3-mreB1-R      | ACAAAGAATTAGATTATTAATGAAAGGAGACAATCATAGATG   | pSeW315                               |
| mreB4-mChe-F       | ATAATAGCTGATGATCCTGAGTATTTTGCTAATGAACCAATTC  | pSeW545-F4                            |
| mreB4-mChe-R       | ATAAAAGTGGAGCTCCTGGTCCAGACGAAAGAAAAATGAAAGTT | pSeW545-F4                            |
| mreB5-mChe-F       | ATAATAGCTGATGATCCTGAGTATTTAACTAATGAACCGATGTA | pSeW545-F5                            |
| mreB5-mChe-R       | ATAAAAGTGGAGCTCCTGGTCATAATGAACGTGCAATGCAAATT | pSeW545-F5                            |
| SWmCh-linker-R2    | TCAGGATCATCAGCTATTATTAAGAATTT                | pSeW545-F5, pSeW545-F4                |
| SWmCh-linker-F     | ACCAGGAGCTCCACTTTTATATAGTTTCATCCATACCAC      | pSeW545-F5, pSeW545-F4                |
| mreB4-SD-fibril-R  | TTCGTTTTAAAAAGTGAATAAAAAAGGGAGGAATTTTACAATGG | pSeW6545                              |
| fibril-F           | TTATTCACTTTTTAAACGAATAGTTAC                  | pSeW6545                              |
| coloP-puroR-F-Hana | ggagtagtccaacagcaacagca                      | colony PCR                            |
| syn3B-junc-F       | TATGTGATAATGCCAATCGCTAAG                     | colonyPCR                             |
| syn3B-junc-R       | GTAAATTCCTCAAATTTCCATCA                      | colonyPCR                             |

**Table S2.**

Protein identification by mass spectrometry for Fig. S4.

| Bacterial strain      | Protein band | Gene ID    | Annotation                          | Mass (kDa) | score | coverage (%) |
|-----------------------|--------------|------------|-------------------------------------|------------|-------|--------------|
| <i>S. eriocheiris</i> | i            | SPE_0666   | Fibril                              | 58.7       | 184   | 63           |
| <i>S. eriocheiris</i> | ii           | SPE_1231   | MreB5                               | 38.7       | 117   | 54           |
| <i>S. eriocheiris</i> | iv           | SPE_1230   | MreB4                               | 40.7       | 64    | 49           |
| <i>S. eriocheiris</i> | iv           | SPE_1049   | GAPDH                               | 35.8       | 129   | 68           |
| <i>S. eriocheiris</i> | v            | SPE_1224   | MreB2                               | 37.9       | 55    | 36           |
| original syn3B        | i            | ODP2_MYCCT | 2-oxo acid dehydrogenase subunit E2 | 47         | 43    | 24           |
| original syn3B        | iii          | -          | -                                   | -          | -     | -            |
| syn3Bsw               | i            | SPE_0666   | Fibril                              | 58.7       | 124   | 52           |
| syn3Bsw               | i            | ODP2_MYCCT | 2-oxo acid dehydrogenase subunit E2 | 47         | 69    | 36           |
| syn3Bsw               | ii           | SPE_1231   | MreB5                               | 38.7       | 131   | 57           |
| syn3Bsw               | iii          | SPE_1228   | MreB3                               | 38.5       | 187   | 71           |
| syn3Bsw               | iv           | SPE_1230   | MreB4                               | 40.7       | 86    | 57           |
| syn3Bsw               | iv           | SPE_1228   | MreB3                               | 38.5       | 89    | 48           |
| syn3Bsw               | iv           | SPE_1224   | MreB2                               | 37.9       | 46    | 34           |
| syn3Bsw               | v            | SPE_1224   | MreB2                               | 37.9       | 101   | 42           |
| syn3Bsw               | v            | SPE_0470   | MreB1                               | 38         | 96    | 45           |

**Movie S1.**

Cell behaviors of three strains indicated on top. Real time movie for 5 s.

**Movie S2.**Rotational behaviors of freely moving site of *Spiroplasma* and syn3Bsw cells for 10 s.**Movie S3.**

Cells lacking one of seven proteins from syn3sw for 10 s.

**Movie S4.**Cells expressing single *Spiroplasma* protein for 5 s.**Movie S5.**

Syn3B cells expressing pair of SMreBs for 10 s.

**Movie S6.**

Cells expressing single protein for 10 s.

**Movie S7.**

SMreB5 localization in cell expressing SMreB 4 and 5 visualized by fluorescence for 10 s.

**Movie S8.**

syn3B cells expressing SMreBs 4, 5, and fibril for 10 s.

**Data S1. (separate file)**

DNA sequences of constructs used in this study.
